# Supplementary material for: The high yield synthesis and characterization of gold nanoparticles with superior stability and their catalytic activity
Source: Royal Society of Chemistry journal article supplement (doi:10.1039/c2ce25840d), 2012-01-01
Supplement: c2ce25840d.pdf [file c2ce25840d.pdf]

## Supporting information

# The High Yield Synthesis and Characterization of Gold Nanoparticles with Superior Stability and Their Catalytic Activity

Han Jia,<sup>a</sup> Xinpei Gao,<sup>a</sup> Zhaolong Chen,<sup>a</sup> Guoqiang Liu,<sup>a</sup> Xiao Zhang,<sup>a</sup> Hui Yan,<sup>a,b</sup>  
Hongtao Zhou<sup>a,c</sup> and Liqiang Zheng<sup>a\*</sup>

*a, Key Laboratory of Colloid and Interface Chemistry, Shandong University, Ministry of Education, Jinan, 250100, China.*

*b, Department of Chemistry, Liaocheng Universtiy, Liaocheng, 252000, China.*

*c, College of Petroleum Engineering, China University of Petroleum (Huadong), Qingdao, Shandong 266555, China.*

Tel.: +86 531 88366062

Fax: +86 531 88564750

E-mail address: [lqzheng@sdu.edu.cn](mailto:lqzheng@sdu.edu.cn)

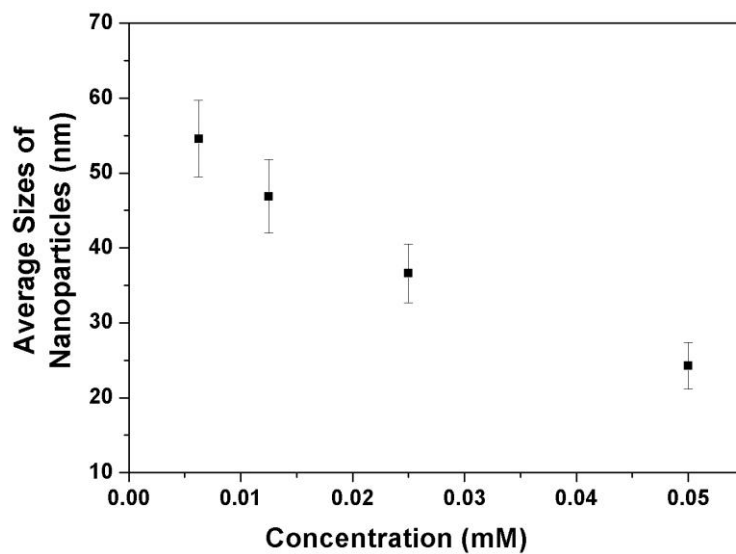

Figure S1. The average sizes of gold nanoparticles synthesized at various initial concentration of BPS-30 after incubation of 4 hours. The concentration of  $\text{HAuCl}_4$  is set as 0.5 mM.

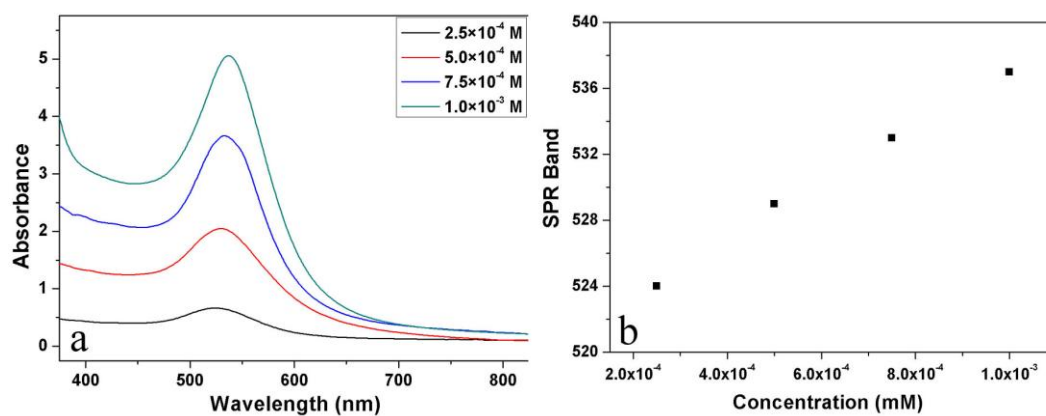

Figure S2. (a) UV-vis absorption spectra of gold nanoparticles synthesized at various initial concentration of HAuCl<sub>4</sub> after incubation of 4 hours. The concentration of BPS-30 is set as 50 mM. (b) The corresponding plot of  $\lambda_{\max}$  values against the concentrations of HAuCl<sub>4</sub>.

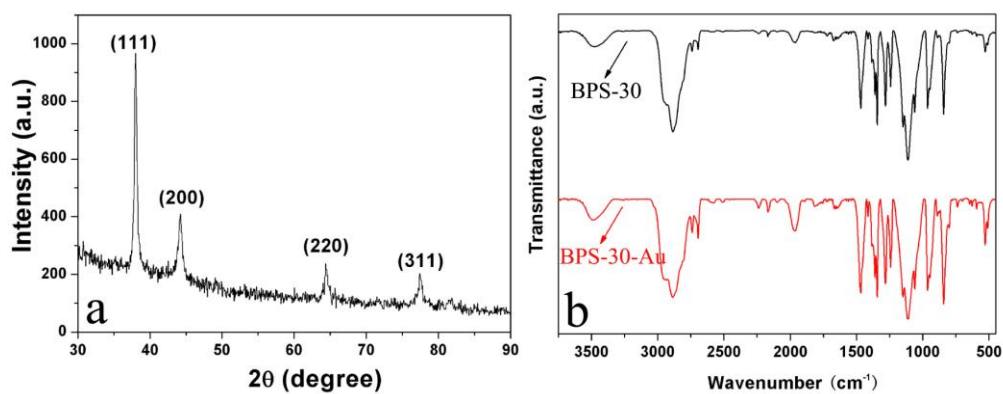

Figure S3 (a) XRD patterns characteristics of the gold nanoparticles. (b) FTIR spectra of BPS-30 and BPS-30 capped gold nanoparticles. The concentrations of BPS-30 and  $\text{HAuCl}_4$  are 50 and 0.5 mM, respectively. And the incubation time is 4 h.

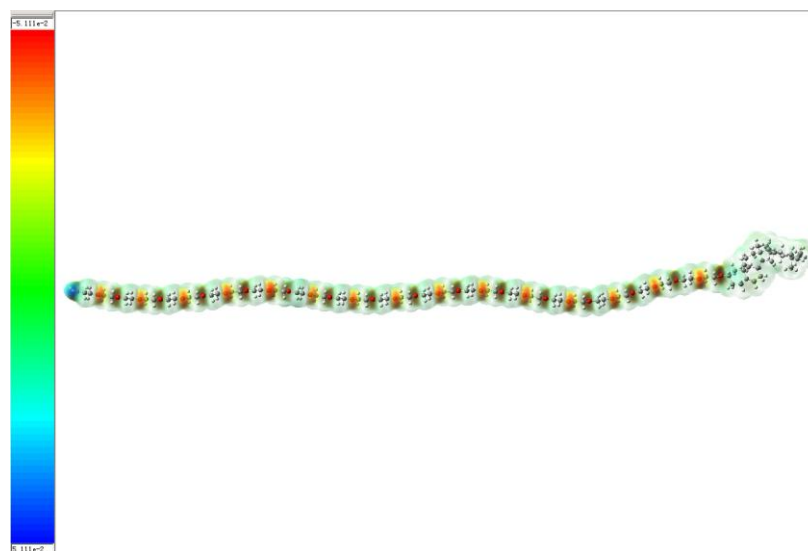

Figure S4. The configuration and electron density of BPS-30.

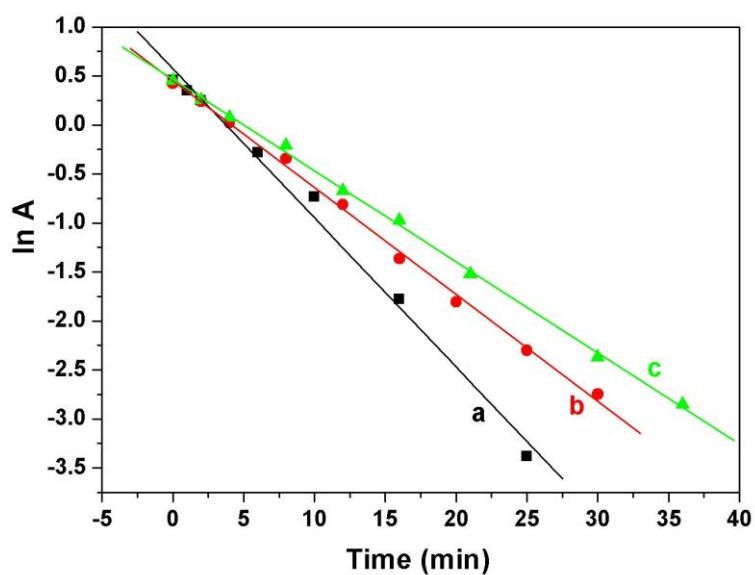

Figure S5. The corresponding linear relationship between  $\ln(A_t/A_0)$  and reduction time for the catalytic reduction of 4-nitroaniline by  $\text{KBH}_4$  in aqueous solution when the different sizes of the gold nanoparticles were used:  $24.3 \pm 3.1$  nm (line a),  $36.6 \pm 3.9$  nm (line b), and  $46.9 \pm 4.5$  nm (line c). And the first-order rate constants,  $k_a$ , were calculated to be  $0.152 \text{ min}^{-1}$ ,  $0.109 \text{ min}^{-1}$  and  $0.093 \text{ min}^{-1}$  for the line a, line b and line c, respectively.

**The calculation of Turnover Number (TON) and Turnover Frequency (TOF) are followed:**

The approximate number of the nanoparticles in our system is about  $4.0 \times 10^8$ , that is  $6.65 \times 10^{-16}$  mol. And the approximate numbers of 4-nitroaniline are  $3.0 \times 10^{-6}$  mol,  $3.3 \times 10^{-6}$  mol, and  $3.7 \times 10^{-6}$  mol for the first, second, and third cycle, respectively.

According to the equations:

$$\text{TON} = \text{mol (substrat)} / \text{mol (catalyst)}$$

$$\text{TOF} = \text{TON} / \text{time}$$

The TON are  $4.5 \times 10^9$  mol/mol,  $5.0 \times 10^9$  mol/mol, and  $5.6 \times 10^9$  mol/mol for the first, second, and third cycle, respectively.

The TOF are  $1.8 \times 10^8$  mol/(mol·min),  $1.1 \times 10^8$  mol/(mol·min), and  $1.0 \times 10^8$  mol/(mol·min) for the first, second, and third cycle, respectively.
